# Supplementary material for: Synthesis, structure and redox properties of bis(cyclopentadienyl)dithiolene complexes of molybdenum and tungsten
Source: Royal Society of Chemistry journal article supplement (doi:10.1039/c1dt10663e), 2011-01-01
Supplement: c1dt10663e.pdf [file c1dt10663e.pdf]

Supplementary information

Synthesis, Structure and Redox Properties of  
Bis(cyclopentadieny1)dithiolene Complexes of Molybdenum and Tungsten

Alexandra L. Whalley, Alexander J. Blake, David Collison, E. Stephen Davies, Helen J. Disley, Frank E. Mabbs, Madeleine Helliwell, Jonathan McMaster, Claire Wilson and C. David Garner

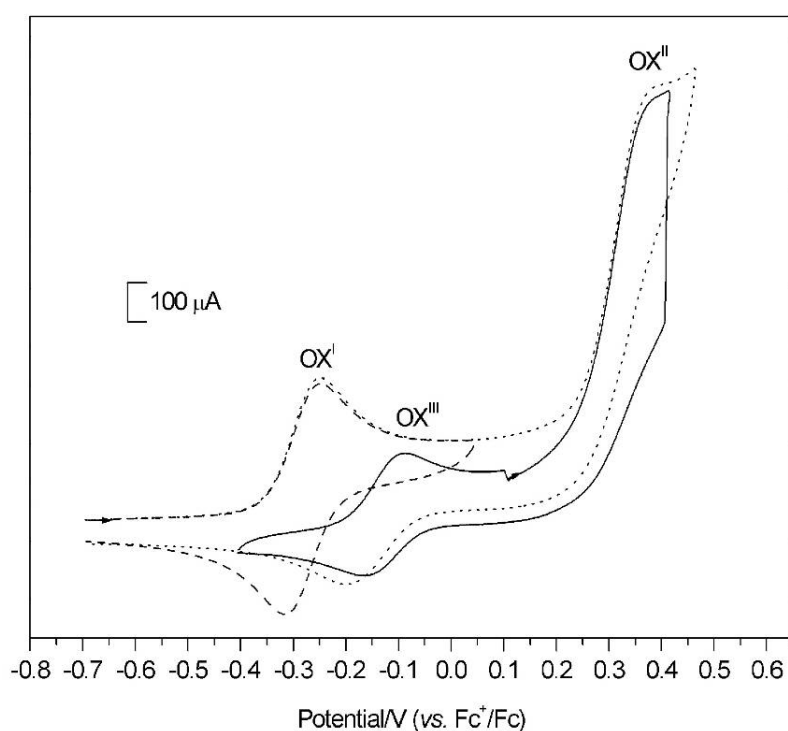

**Fig. S1** Cyclic voltammograms recorded for  $[\text{Cp}_2\text{Mo}(2\text{-pedt})]$  (**2**) (1 mmol) in dmf containing  $[\text{Bu}_4\text{N}][\text{BF}_4]$  (0.2 M) recorded at ambient temperature and a scan rate of  $0.1 \text{ V s}^{-1}$ . The dashed line shows the current response for  $\text{OX}^{\text{I}}$  when the direction of sweep is reversed at +0.04 V; the dotted line shows the effect on current response for  $\text{OX}^{\text{I}}$  when the direction of sweep is reversed at +0.46 V; the solid line was generated by holding the potential at +0.41 V (ca.  $\text{OX}^{\text{II}}$ , see Table 1) for 10 seconds before reversing the potential sweep, this resulted in the depletion of  $\text{OX}^{\text{I}}$  and the generation of the new redox couple,  $\text{OX}^{\text{III}}$ .

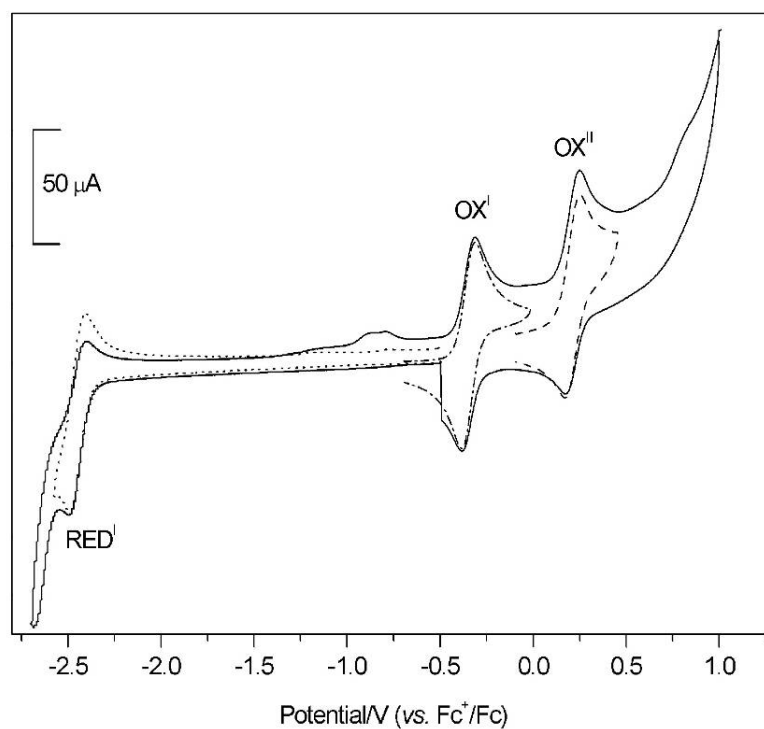

**Fig. S2** Cyclic voltammograms recorded for  $[\text{Cp}_2\text{W}(\text{sdt})]$  (**6**) (1 mmol) in dmf containing  $[\text{tBu}_4\text{N}][\text{BF}_4]$  (0.2 M) recorded at ambient temperature and a scan rate of  $0.1 \text{ Vs}^{-1}$ . Broken lines show the effect of switching potential on the current response for  $\text{OX}^{\text{I}}$  ( $E_\lambda$ ; -0.02 V, dashed-dotted line),  $\text{OX}^{\text{II}}$  ( $E_\lambda$ ; +0.45 V, dotted line) and  $\text{RED}^{\text{I}}$  ( $E_\lambda$ ; -2.58 V, dashed line), all at  $0.1 \text{ Vs}^{-1}$ .

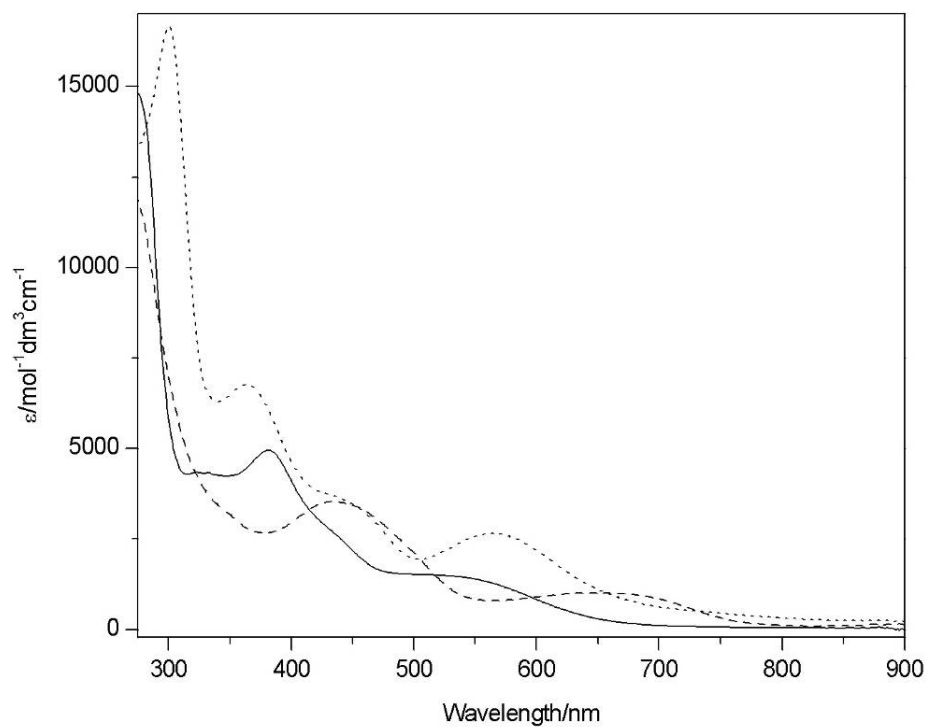

**Fig. S3** UV/vis spectra of  $[\text{Cp}_2\text{Mo}(\text{2-pedt})]$  (**2**) (solid line) and electrochemically generated  $[\mathbf{2}]^+$  (dashed line) and  $[\mathbf{2}]^-$  (dotted line) in dmf containing  $[\text{nBu}_4\text{N}][\text{BF}_4]$  (0.2 M) at 273 K.

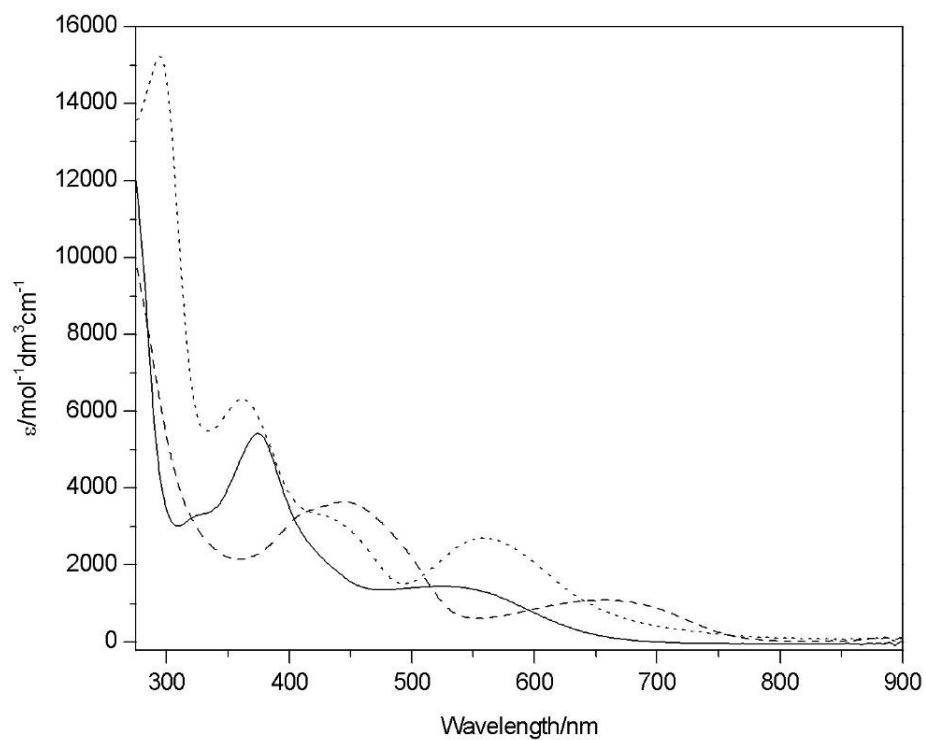

**Fig. S4** UV/vis spectra of  $[\text{Cp}_2\text{Mo}(\text{3-pedt})]$  (**3**) (solid line) and electrochemically generated  $[\text{3}]^+$  (dashed line) and  $[\text{3}]^-$  (dotted line) in dmf containing  $[\text{nBu}_4\text{N}][\text{BF}_4]$  (0.2 M) at 273 K. For  $[\text{3}]^+$  an absorption at 1142 nm was observed analogous to that of  $[\text{Cp}_2\text{Mo}(\text{sdt})]^+$  (see Fig. 2).

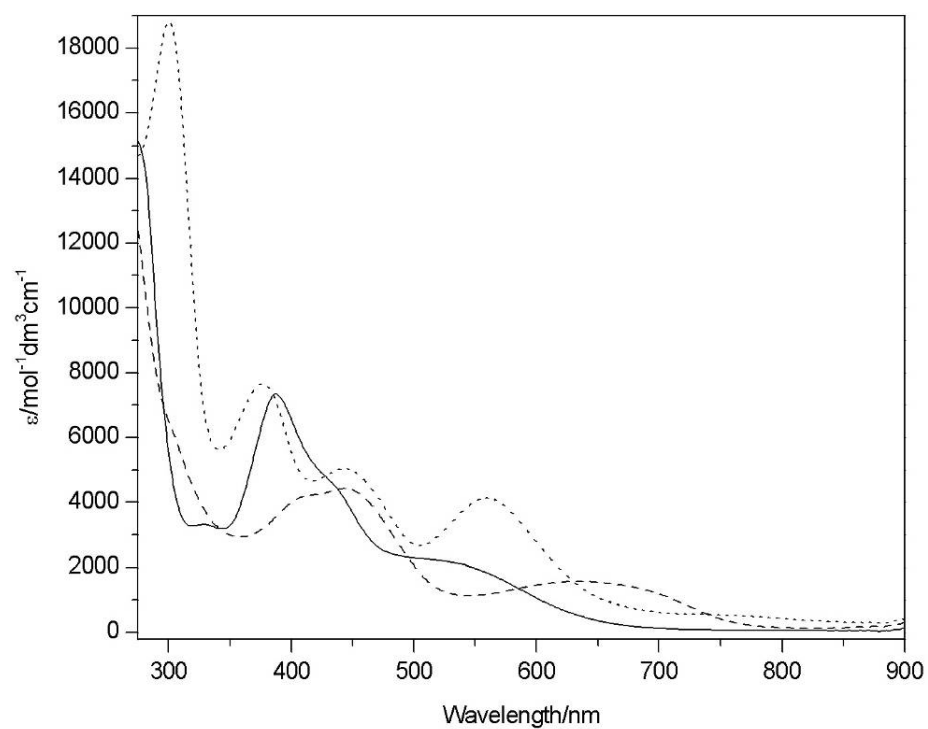

**Fig. S5** UV/vis spectra of [Cp<sub>2</sub>Mo(4-pedt)] (**4**) (solid line) and electrochemically generated [4]<sup>+</sup> (dashed line) and [4]<sup>-</sup> (dotted line) in dmf containing [<sup>n</sup>Bu<sub>4</sub>N][BF<sub>4</sub>] (0.2 M) at 273 K.

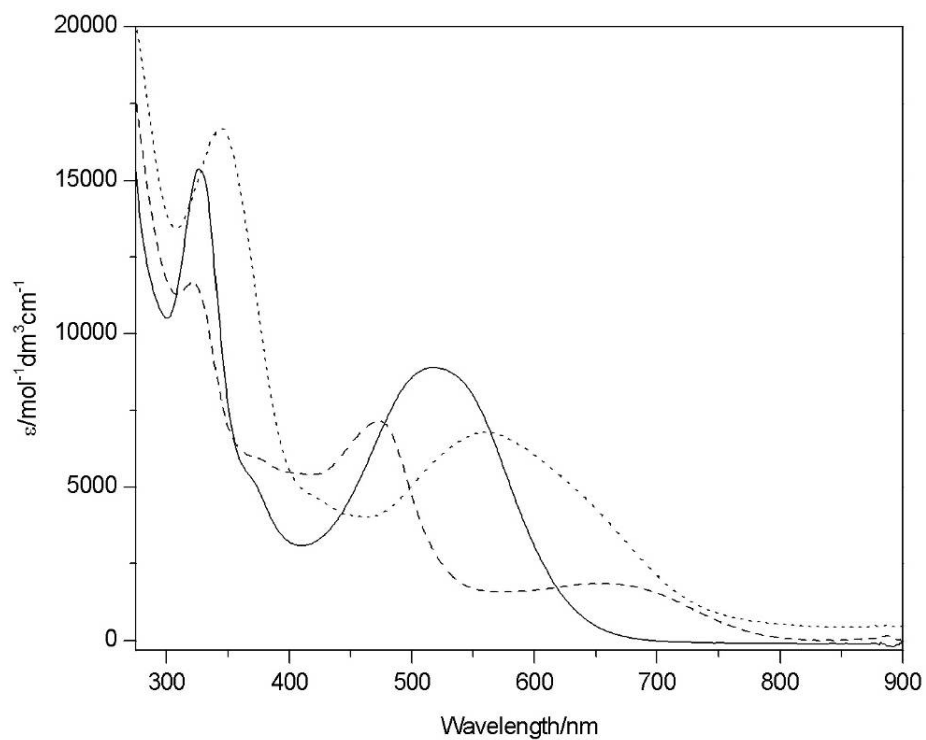

**Fig. S6** UV/vis spectra of  $[\text{Cp}_2\text{Mo}(\text{qedt})]$  (**5**) (solid line) and electrochemically generated  $[\mathbf{5}]^+$  (dashed line) and  $[\mathbf{5}]^-$  (dotted line) in dmf containing  $[\text{nBu}_4\text{N}][\text{BF}_4]$  (0.2 M) at 273 K. For  $[\mathbf{5}]^+$  an absorption at 1142 nm was observed analogous to that of  $[\text{Cp}_2\text{Mo}(\text{sdt})]^+$  (see Fig. 2).

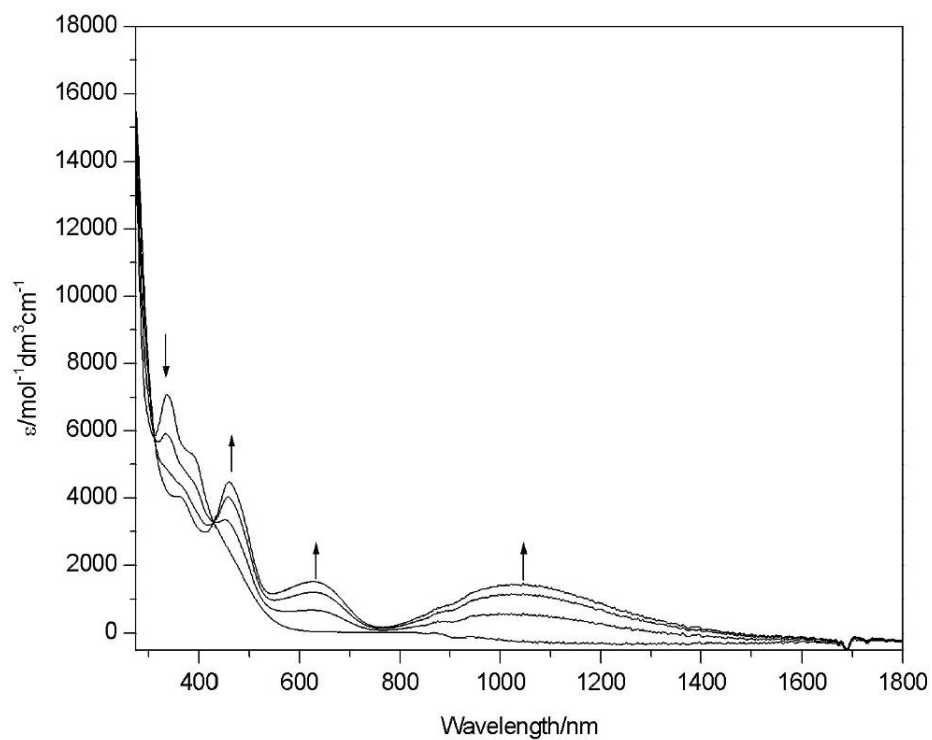

**Fig. S7** Changes in the UV/vis/NIR spectra observed for the electrochemical conversion of [Cp<sub>2</sub>W(sdt)] (**6**) to [6]<sup>+</sup> in dmf containing [<sup>n</sup>Bu<sub>4</sub>N][BF<sub>4</sub>] (0.2 M) at 273 K.

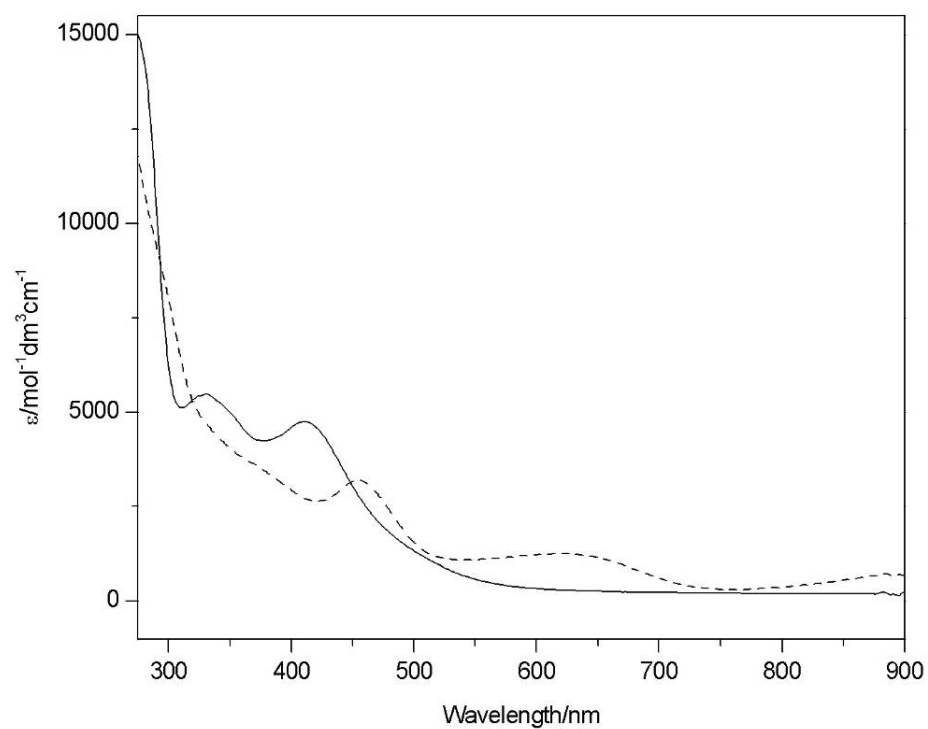

**Fig. S8** UV/vis spectra of [Cp<sub>2</sub>W(2-pedt)] (7) (solid line) and electrochemically generated [7]<sup>+</sup> (dashed line) in dmf containing [tBu<sub>4</sub>N][BF<sub>4</sub>] (0.2 M) at 273 K.



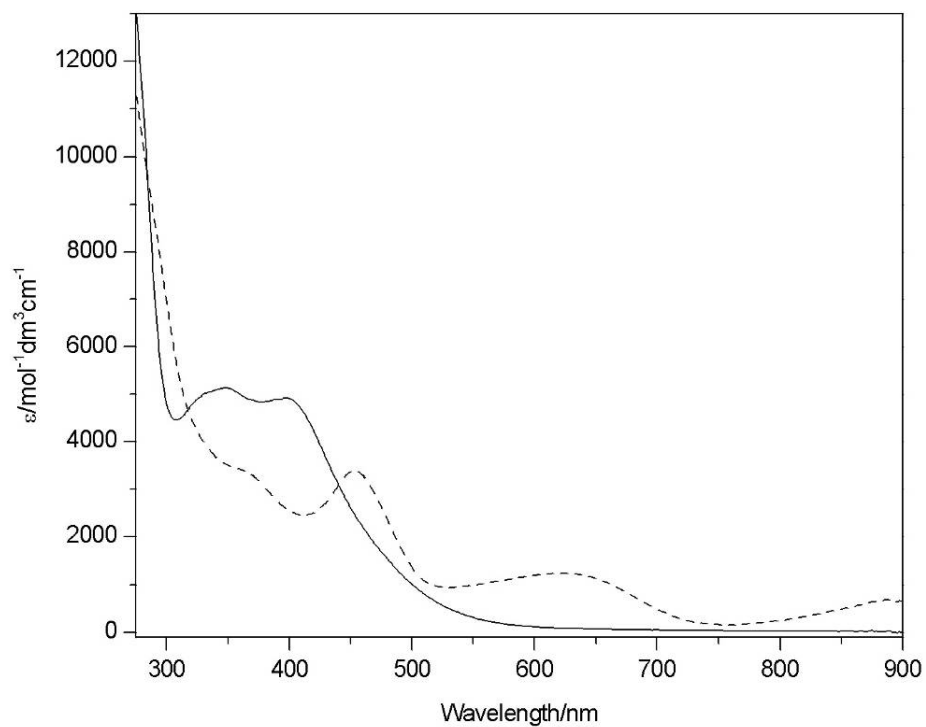

**Fig. S9** UV/vis spectra of [Cp<sub>2</sub>W(3-pedt)] (**8**) (solid line) and electrochemically generated [**8**]<sup>+</sup> (dashed line) in dmf containing [tBu<sub>4</sub>N][BF<sub>4</sub>] (0.2 M) at 273 K. For [**8**]<sup>+</sup> a NIR absorption at 1030 nm was observed analogous to that of [Cp<sub>2</sub>W(sdt)]<sup>+</sup> ([**6**]<sup>+</sup>) (see Fig. S7).

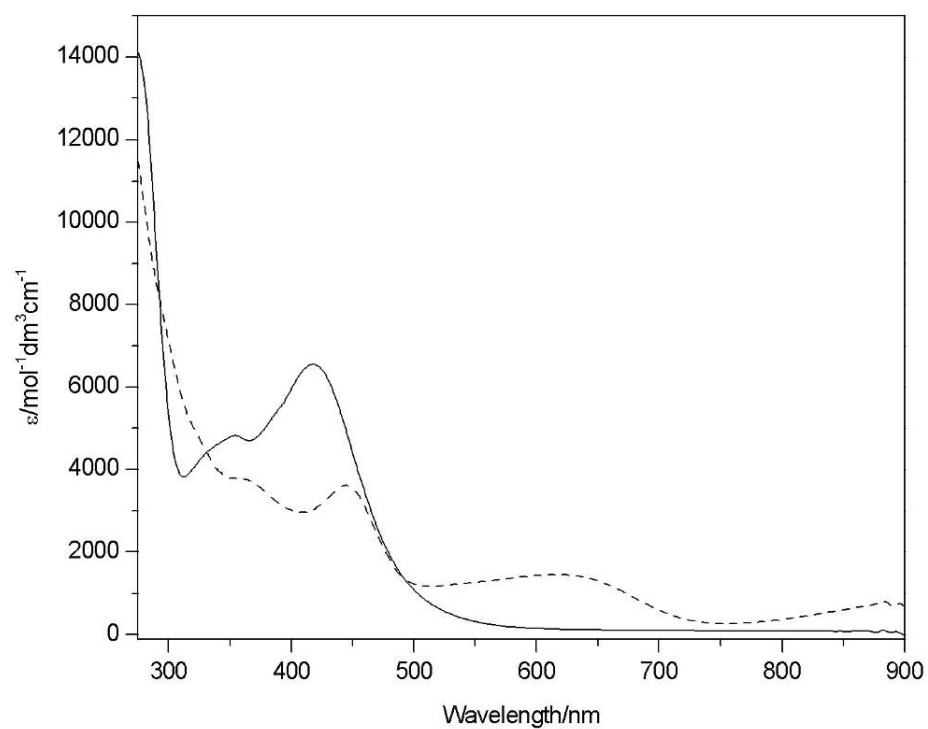

**Fig. S10** UV/vis spectra of [Cp<sub>2</sub>W(4-pedt)] (**9**) (solid line) and electrochemically generated [9]<sup>+</sup> (dashed line) in dmf containing [tBu<sub>4</sub>N][BF<sub>4</sub>] (0.2 M) at 273 K.

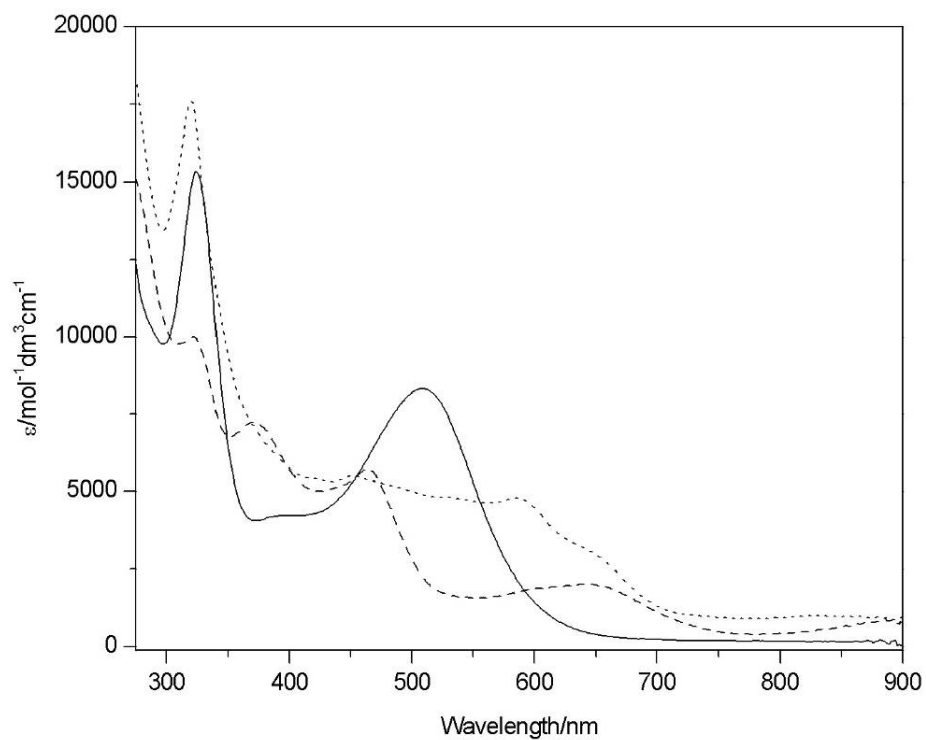

**Fig. S11** UV/vis spectra of  $[\text{Cp}_2\text{W}(\text{qedt})]$  (**10**) (solid line) and electrochemically generated  $[\mathbf{10}]^+$  (dashed line) and  $[\mathbf{10}]^-$  (dotted line) in dmf containing  $[\text{tBu}_4\text{N}][\text{BF}_4]$  (0.2 M) at 273 K. For  $[\mathbf{2}]^+$  an absorption at 1046 nm was observed analogous to that of  $[\text{Cp}_2\text{W}(\text{sdt})]^+$  (see Fig. S7).

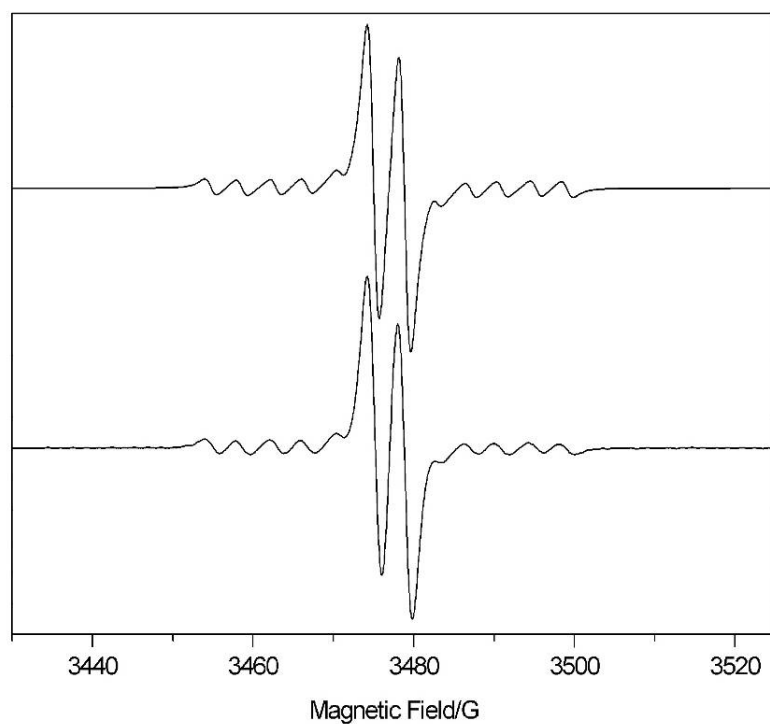

**Fig. S12** X-band EPR spectra of  $[\text{Cp}_2\text{Mo}(\text{sdt})]^+$  ( $[\mathbf{1}]^+$ ): lower trace, spectrum recorded for electrochemically generated  $[\mathbf{1}]^+$  (1 mM) in dmf containing  $[\text{nBu}_4\text{N}][\text{BF}_4]$  (0.2 M) at 273 K; upper trace, simulation of the experimental spectrum using the parameters given in Table 4 and a Lorentzian line shape.

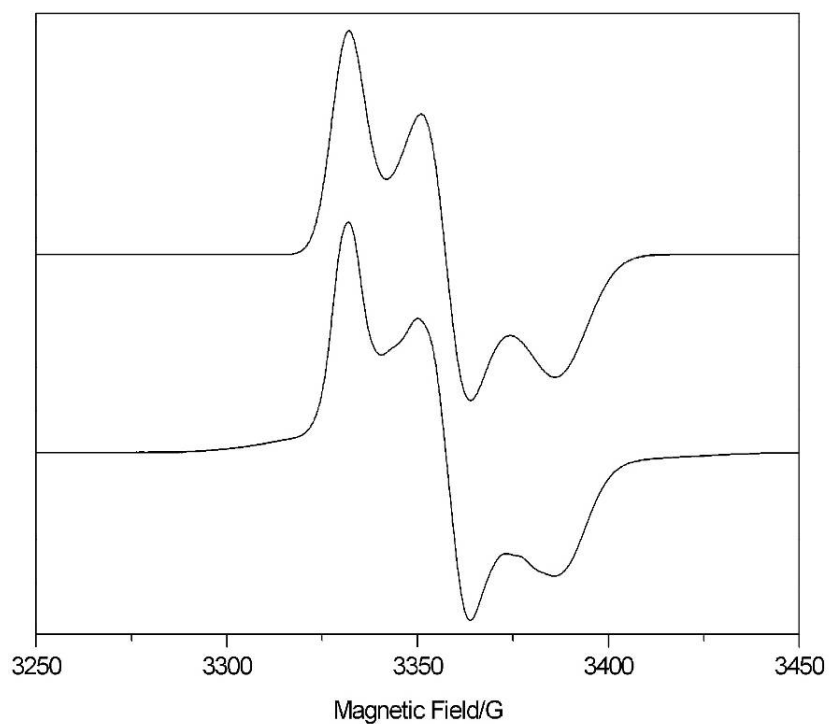

**Fig. S13** X-band EPR spectra of  $[1]^+$ : lower trace, spectrum recorded for  $[1]^+$  (1 mM) in  $\text{CH}_2\text{Cl}_2$ :dmf (4:1 v/v) at 77 K,  $[1]^+$  was generated by the oxidation of **1** with *ca.* 1 equivalent of  $[\text{Cp}_2\text{Fe}][\text{BF}_4]$ ; upper trace, simulation of the experimental spectrum using the parameters given in Table 4 and a Gaussian line shape.

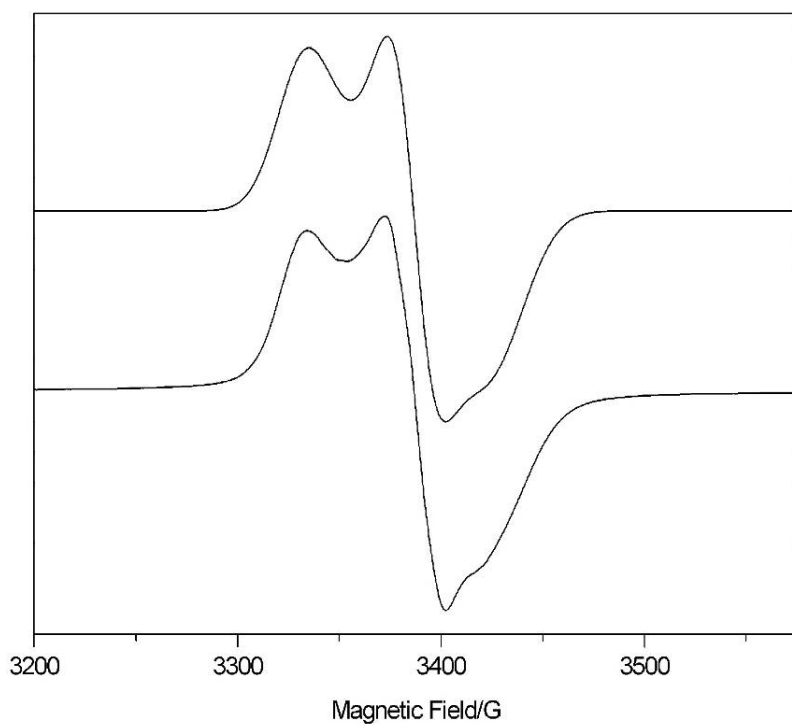

**Fig. S14** X-band EPR spectra of  $[6]^+$ : lower trace, spectrum recorded for  $[6]^+$  (1 mM) in  $\text{CH}_2\text{Cl}_2$ :dmf (4:1 v/v) at 77 K,  $[6]^+$  was generated by the oxidation of **6** with *ca.* 1 equivalent of  $[\text{Cp}_2\text{Fe}][\text{BF}_4]$ ; upper trace, simulation of the experimental spectrum using the parameters given in Table 4 and a Gaussian line shape.

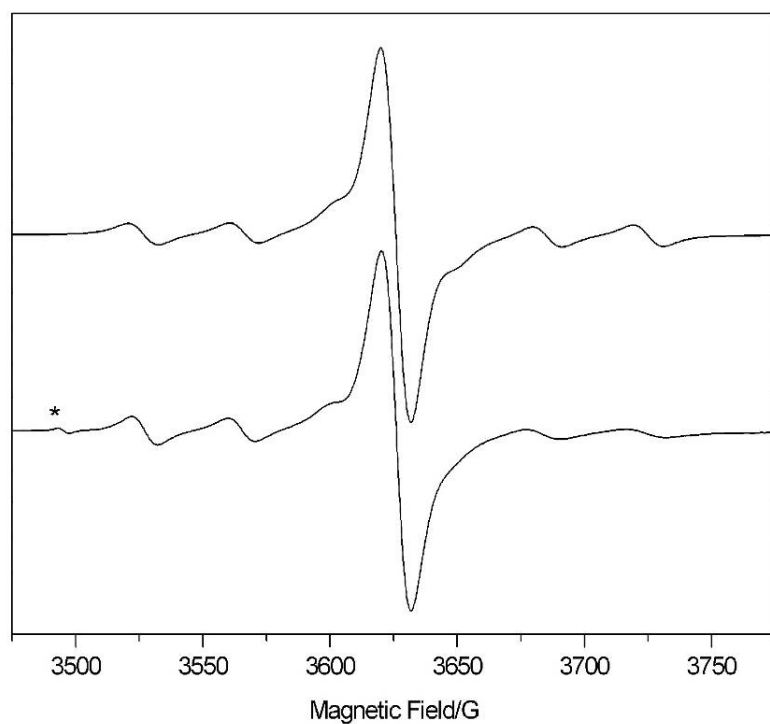

**Fig. S15** X-band EPR spectra of  $[3]^-$ : lower trace, spectrum recorded for electrochemically generated  $[3]^-$  (1 mM) in dmf containing  $[n\text{Bu}_4\text{N}][\text{BF}_4]$  (0.2 M) at 273 K; upper trace, simulation of the experimental spectrum using the parameters given in Table 4 and a Lorentzian line shape. \* indicates a small quantity of  $[3]^+$  generated at the secondary electrode during the *in situ* generation of  $[3]^-$

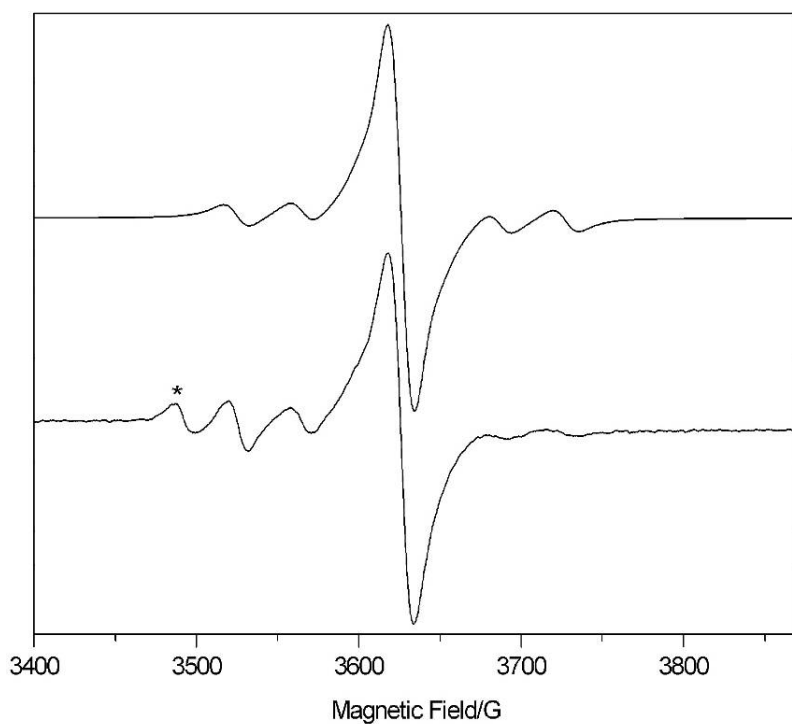

**Fig. S16** X-band EPR spectra of [5]: lower trace, spectrum recorded for electrochemically generated [5]<sup>-</sup> (1 mM) in dmf containing [nBu<sub>4</sub>N][BF<sub>4</sub>] (0.2 M) at 273 K; upper trace, simulation of the experimental spectrum using the parameters given in Table 4 and a Lorentzian line shape. \* indicates a small quantity of [5]<sup>+</sup> generated at the secondary electrode during the *in situ* generation of [5]<sup>-</sup>.



Geometry optimised structure of **1**

|    |          |          |          |
|----|----------|----------|----------|
| H  | -2.22119 | 2.10000  | -0.35843 |
| H  | -1.23423 | 1.17933  | -2.70128 |
| H  | -0.11667 | 2.72399  | 1.22646  |
| H  | 1.45659  | 1.25847  | -2.56942 |
| H  | 2.15191  | 2.22303  | -0.14822 |
| H  | -4.45187 | 1.09199  | 5.89830  |
| H  | -3.16193 | 1.05057  | 3.78226  |
| H  | -1.43522 | -1.25928 | -2.58109 |
| H  | -3.49846 | 0.08158  | 7.97333  |
| H  | 1.25617  | -1.18996 | -2.69051 |
| H  | 1.27920  | 0.04627  | 4.22154  |
| H  | -2.15527 | -2.21258 | -0.16091 |
| H  | -1.24367 | -0.98908 | 7.88881  |
| H  | 0.02238  | -1.06406 | 5.76848  |
| H  | 2.21976  | -2.11046 | -0.33799 |
| H  | 0.09861  | -2.72054 | 1.23178  |
| C  | -1.17274 | 1.98765  | -0.61325 |
| C  | -0.64906 | 1.52629  | -1.85575 |
| C  | -0.05982 | 2.34410  | 0.21392  |
| C  | 0.77007  | 1.56770  | -1.78743 |
| C  | 1.14032  | 2.06365  | -0.50685 |
| C  | -3.46552 | 0.62485  | 5.87663  |
| C  | -2.74252 | 0.59918  | 4.68249  |
| C  | -2.93254 | 0.06244  | 7.04051  |
| C  | -1.46365 | 0.01026  | 4.61773  |
| C  | -0.68461 | -0.00018 | 3.36246  |
| C  | -0.75710 | -1.56792 | -1.79168 |
| C  | 0.66266  | -1.53317 | -1.84906 |
| C  | 0.67177  | 0.00123  | 3.31733  |
| C  | -1.66682 | -0.53342 | 6.99211  |
| C  | -0.94689 | -0.56601 | 5.79795  |
| C  | -1.14058 | -2.05831 | -0.51270 |
| C  | 1.17383  | -1.99459 | -0.60205 |
| C  | 0.05265  | -2.34256 | 0.21798  |
| Mo | -0.00000 | 0.00000  | 0.00000  |
| S  | -1.57269 | -0.00000 | 1.81796  |
| S  | 1.57269  | -0.00000 | 1.82101  |

**Energy:** -233.49440977 eV

Geometry optimised structure of [1]<sup>+</sup>

|    |          |          |          |
|----|----------|----------|----------|
| H  | -2.23277 | 2.09928  | -0.25100 |
| H  | -1.23741 | 1.21989  | -2.59730 |
| H  | -0.12593 | 2.68168  | 1.36397  |
| H  | 1.46150  | 1.29710  | -2.45722 |
| H  | 2.15353  | 2.22941  | -0.02997 |
| H  | -4.41270 | 1.94662  | 5.65183  |
| H  | -3.17501 | 1.47685  | 3.55856  |
| H  | -1.42376 | -1.31960 | -2.45991 |
| H  | -3.38872 | 1.40660  | 7.85978  |
| H  | 1.27372  | -1.25647 | -2.55894 |
| H  | 1.27359  | 0.56410  | 4.16105  |
| H  | -2.16029 | -2.21025 | -0.02414 |
| H  | -1.12393 | 0.36951  | 7.95365  |
| H  | 0.10605  | -0.12344 | 5.87637  |
| H  | 2.22948  | -2.11791 | -0.18723 |
| H  | 0.09436  | -2.67373 | 1.40003  |
| C  | -1.18307 | 1.97901  | -0.49759 |
| C  | -0.65740 | 1.52563  | -1.73161 |
| C  | -0.06600 | 2.28122  | 0.35841  |
| C  | 0.77676  | 1.56756  | -1.65894 |
| C  | 1.14242  | 2.05430  | -0.38327 |
| C  | -3.42213 | 1.49399  | 5.69891  |
| C  | -2.72912 | 1.22448  | 4.52090  |
| C  | -2.84610 | 1.19468  | 6.93826  |
| C  | -1.43844 | 0.65523  | 4.55774  |
| C  | -0.70006 | 0.37629  | 3.31584  |
| C  | -0.75283 | -1.58336 | -1.64814 |
| C  | 0.67828  | -1.55096 | -1.70028 |
| C  | 0.68763  | 0.35553  | 3.26500  |
| C  | -1.57079 | 0.61910  | 6.99144  |
| C  | -0.87180 | 0.35362  | 5.81717  |
| C  | -1.14378 | -2.04479 | -0.36734 |
| C  | 1.18425  | -1.98982 | -0.45057 |
| C  | 0.05314  | -2.28825 | 0.38800  |
| Mo | 0.00000  | 0.00000  | 0.00000  |
| S  | -1.60465 | 0.00000  | 1.87258  |
| S  | 1.60465  | 0.00000  | 1.86767  |

**Energy:** -227.66471372 eV

Geometry optimised structure of [1]<sup>-</sup>

|    |          |          |          |
|----|----------|----------|----------|
| H  | -2.18196 | 2.14022  | -0.40150 |
| H  | -1.33774 | 1.36582  | -2.85839 |
| H  | 0.00697  | 2.66797  | 1.10334  |
| H  | 1.33917  | 1.34719  | -2.85761 |
| H  | 2.19372  | 2.12180  | -0.40515 |
| H  | -4.60915 | 0.57127  | 5.84061  |
| H  | -3.31191 | 0.52242  | 3.72496  |
| H  | -1.33626 | -1.32749 | -2.86130 |
| H  | -3.49113 | 0.05658  | 8.02119  |
| H  | 1.34092  | -1.31983 | -2.85740 |
| H  | 1.28520  | 0.01479  | 4.23561  |
| H  | -2.18638 | -2.12982 | -0.41470 |
| H  | -1.05430 | -0.52477 | 8.02474  |
| H  | 0.21722  | -0.59349 | 5.92430  |
| H  | 2.18970  | -2.12721 | -0.41431 |
| H  | -0.00172 | -2.67948 | 1.08693  |
| C  | -1.14966 | 1.99639  | -0.70771 |
| C  | -0.69774 | 1.65756  | -2.02910 |
| C  | 0.00576  | 2.29622  | 0.08547  |
| C  | 0.70240  | 1.64729  | -2.02840 |
| C  | 1.15952  | 1.98281  | -0.70780 |
| C  | -3.54474 | 0.32418  | 5.86632  |
| C  | -2.82082 | 0.29684  | 4.67242  |
| C  | -2.92461 | 0.03882  | 7.08816  |
| C  | -1.43855 | -0.01009 | 4.64759  |
| C  | -0.68335 | -0.01816 | 3.38536  |
| C  | -0.69873 | -1.62973 | -2.03400 |
| C  | 0.70226  | -1.62493 | -2.03189 |
| C  | 0.67787  | -0.01394 | 3.32904  |
| C  | -1.55856 | -0.28344 | 7.08597  |
| C  | -0.83619 | -0.31277 | 5.89477  |
| C  | -1.15370 | -1.98664 | -0.71900 |
| C  | 1.15624  | -1.98171 | -0.71659 |
| C  | 0.00017  | -2.29891 | 0.07221  |
| Mo | 0.00000  | 0.00000  | 0.00000  |
| S  | -1.59065 | -0.00000 | 1.83107  |
| S  | 1.59065  | 0.00000  | 1.83670  |

**Energy:** -234.82671100 eV

Geometry optimised structure of **6**

|   |          |          |          |
|---|----------|----------|----------|
| H | 1.26630  | -0.04089 | 4.22991  |
| H | 1.82791  | -2.50438 | 0.44866  |
| H | 0.00902  | 1.06879  | 5.77834  |
| H | 1.32048  | 2.70045  | 0.94450  |
| H | -1.25195 | 0.96001  | 7.89941  |
| H | 1.91523  | -1.44848 | -2.02090 |
| H | 2.20721  | 1.64629  | -1.38279 |
| H | -0.72591 | -2.67720 | 1.21870  |
| H | -3.49205 | -0.14202 | 7.98085  |
| H | -1.33729 | 2.68391  | 0.93782  |
| H | -0.64864 | -1.03189 | -2.82409 |
| H | -3.15475 | -1.06421 | 3.77862  |
| H | 0.02077  | 1.00483  | -2.85672 |
| H | -4.43729 | -1.14464 | 5.89754  |
| H | -2.30168 | -1.80021 | -0.81825 |
| H | -2.20169 | 1.62609  | -1.39409 |
| S | 1.60353  | -0.00000 | 1.83367  |
| S | -1.60353 | -0.00000 | 1.82297  |
| C | 0.66568  | 0.00588  | 3.32124  |
| C | 0.96900  | -2.24272 | -0.15878 |
| C | -0.95350 | 0.55728  | 5.80512  |
| C | -1.67063 | 0.50528  | 7.00006  |
| C | 0.69889  | 2.36284  | 0.12292  |
| C | 1.01653  | -1.65420 | -1.44711 |
| C | -0.68679 | 0.00650  | 3.36458  |
| C | 1.17184  | 1.72554  | -1.07002 |
| C | -0.38379 | -2.32218 | 0.25434  |
| C | -1.46390 | -0.01660 | 4.62030  |
| C | -2.92819 | -0.10871 | 7.04709  |
| C | -0.70729 | 2.35447  | 0.11957  |
| C | -0.33662 | -1.40972 | -1.85841 |
| C | -2.73743 | -0.61827 | 4.68257  |
| C | -1.21864 | -1.78718 | -0.79329 |
| C | 0.00730  | 1.38793  | -1.84471 |
| C | -3.45699 | -0.66566 | 5.87862  |
| C | -1.16833 | 1.71474  | -1.07675 |
| W | 0.00000  | 0.00000  | 0.00000  |

**Energy:** -233.58852039 eV

Geometry optimised structure of [6]<sup>+</sup>

|   |          |          |          |
|---|----------|----------|----------|
| H | 1.27689  | 0.11466  | 4.21117  |
| H | 1.36027  | -2.66505 | 0.99359  |
| H | 0.14416  | 1.20909  | 5.69961  |
| H | 1.35329  | 2.67450  | 0.96967  |
| H | -1.05397 | 1.24256  | 7.85123  |
| H | 2.21678  | -1.63907 | -1.35586 |
| H | 2.20557  | 1.63961  | -1.37431 |
| H | -1.31047 | -2.68103 | 1.00269  |
| H | -3.32210 | 0.22773  | 8.04487  |
| H | -1.32084 | 2.67456  | 0.98993  |
| H | 0.00264  | -1.07280 | -2.83365 |
| H | -3.18366 | -0.88065 | 3.88635  |
| H | -0.00971 | 1.06040  | -2.84529 |
| H | -4.38213 | -0.82535 | 6.04780  |
| H | -2.19549 | -1.67375 | -1.34482 |
| H | -2.20567 | 1.65343  | -1.35004 |
| S | 1.60979  | -0.00000 | 1.85591  |
| S | -1.60979 | 0.00000  | 1.86158  |
| C | 0.68984  | 0.10498  | 3.29237  |
| C | 0.72892  | -2.30416 | 0.18763  |
| C | -0.83658 | 0.73941  | 5.77047  |
| C | -1.51681 | 0.77066  | 6.98473  |
| C | 0.71812  | 2.30825  | 0.16967  |
| C | 1.18474  | -1.71236 | -1.03018 |
| C | -0.69951 | 0.10223  | 3.34970  |
| C | 1.17359  | 1.71271  | -1.04769 |
| C | -0.68976 | -2.31473 | 0.19166  |
| C | -1.42395 | 0.14576  | 4.62818  |
| C | -2.79345 | 0.20677  | 7.09154  |
| C | -0.69827 | 2.31144  | 0.17863  |
| C | 0.00789  | -1.40174 | -1.80255 |
| C | -2.71708 | -0.40746 | 4.75092  |
| C | -1.16113 | -1.73108 | -1.02372 |
| C | -0.00308 | 1.39758  | -1.81659 |
| C | -3.39000 | -0.38117 | 5.96945  |
| C | -1.17069 | 1.71843  | -1.03324 |
| W | 0.00000  | -0.00000 | 0.00000  |

**Energy:** -227.81724062 eV

Geometry optimised structure of [6]<sup>-</sup>

|   |          |          |          |
|---|----------|----------|----------|
| H | 1.26482  | -0.37003 | 4.22241  |
| H | 1.25523  | -2.87444 | 0.74200  |
| H | 0.17660  | -1.41984 | 5.71299  |
| H | 1.70535  | 3.25513  | 0.94143  |
| H | -1.08574 | -1.70981 | 7.80226  |
| H | 2.16810  | -1.58141 | -1.45498 |
| H | 2.25555  | 1.72139  | -1.23088 |
| H | -1.40630 | -2.80142 | 0.72827  |
| H | -3.48776 | -1.00765 | 7.94846  |
| H | -0.92723 | 3.46313  | 1.17233  |
| H | -0.00439 | -0.76231 | -2.88390 |
| H | -3.29107 | 0.31465  | 3.83541  |
| H | -0.08991 | 1.34338  | -2.54745 |
| H | -4.57608 | 0.00273  | 5.93197  |
| H | -2.23683 | -1.49716 | -1.48875 |
| H | -2.07952 | 2.09177  | -0.86607 |
| S | 1.60532  | -0.00000 | 1.85910  |
| S | -1.60532 | -0.00000 | 1.83698  |
| C | 0.67274  | -0.27454 | 3.31001  |
| C | 0.64098  | -2.44839 | -0.04523 |
| C | -0.85889 | -1.08009 | 5.75693  |
| C | -1.57671 | -1.25334 | 6.93897  |
| C | 0.97161  | 2.84784  | 0.24906  |
| C | 1.12804  | -1.67824 | -1.15725 |
| C | -0.69131 | -0.29899 | 3.35710  |
| C | 1.26654  | 1.88420  | -0.80653 |
| C | -0.76244 | -2.40935 | -0.05330 |
| C | -1.44445 | -0.49653 | 4.60334  |
| C | -2.92321 | -0.86461 | 7.02447  |
| C | -0.39639 | 2.95355  | 0.37039  |
| C | -0.02319 | -1.22845 | -1.90319 |
| C | -2.80854 | -0.12622 | 4.70895  |
| C | -1.20567 | -1.62593 | -1.17284 |
| C | 0.02326  | 1.60354  | -1.49609 |
| C | -3.52733 | -0.30278 | 5.89294  |
| C | -1.02062 | 2.08186  | -0.61695 |
| W | 0.00000  | -0.00000 | 0.00000  |

**Energy:** -234.36972160 eV

Geometry optimised structure of **5**

|    |          |          |          |
|----|----------|----------|----------|
| Mo | 0.00000  | 0.00000  | 0.00000  |
| S  | -1.60140 | 0.00000  | 1.84146  |
| S  | 1.60140  | 0.00000  | 1.82995  |
| C  | -0.67943 | 0.19128  | 3.30682  |
| C  | 0.68062  | 0.22391  | 3.33990  |
| C  | 1.45697  | 0.48181  | 4.55690  |
| C  | 0.85376  | 1.14251  | 5.68398  |
| N  | 1.51230  | 1.50244  | 6.76286  |
| C  | 2.85198  | 1.19898  | 6.78598  |
| C  | 3.63730  | 1.58374  | 7.89875  |
| C  | 4.98393  | 1.27032  | 7.93795  |
| C  | 5.58416  | 0.55951  | 6.86947  |
| C  | 4.84238  | 0.18491  | 5.76475  |
| C  | 3.46134  | 0.50624  | 5.68897  |
| N  | 2.75233  | 0.16557  | 4.57280  |
| C  | 1.20544  | -1.83960 | -0.79840 |
| C  | 0.34893  | -1.42014 | -1.86709 |
| C  | -1.00895 | -1.65142 | -1.48384 |
| C  | -0.99285 | -2.24935 | -0.19674 |
| C  | 0.35261  | -2.36746 | 0.22850  |
| C  | 0.86826  | 1.61720  | -1.62615 |
| C  | -0.54417 | 1.50075  | -1.81104 |
| C  | -1.19245 | 1.93135  | -0.61843 |
| C  | -0.16212 | 2.31871  | 0.30364  |
| C  | 1.10242  | 2.13093  | -0.32986 |
| H  | -1.28239 | 0.26663  | 4.21163  |
| H  | -0.20680 | 1.40382  | 5.65391  |
| H  | 3.14872  | 2.12778  | 8.70840  |
| H  | 5.58883  | 1.56843  | 8.79462  |
| H  | 6.64493  | 0.31044  | 6.92055  |
| H  | 5.28667  | -0.35590 | 4.92844  |
| H  | 2.29020  | -1.85355 | -0.79991 |
| H  | 0.67296  | -1.00253 | -2.81377 |
| H  | -1.86665 | -2.52015 | 0.38675  |
| H  | 0.67631  | -2.74082 | 1.19145  |
| H  | 1.63280  | 1.34678  | -2.34865 |
| H  | -1.03682 | 1.12752  | -2.70287 |
| H  | -2.26170 | 1.99264  | -0.44868 |
| H  | -0.30887 | 2.67873  | 1.31423  |
| H  | 2.06994  | 2.31175  | 0.12349  |
| H  | -1.89333 | -1.43360 | -2.07661 |

**Energy:** -266.93764740 eV

Geometry optimised structure of **10**

|   |          |          |          |
|---|----------|----------|----------|
| W | 0.00000  | 0.00000  | 0.00000  |
| S | 1.60156  | 0.00000  | 1.83911  |
| S | -1.60156 | 0.00000  | 1.82746  |
| C | 0.67943  | -0.18866 | 3.30740  |
| C | -0.68004 | -0.22014 | 3.34036  |
| C | -1.45724 | -0.47633 | 4.55651  |
| C | -0.85501 | -1.13598 | 5.68470  |
| C | -2.85349 | -1.18929 | 6.78726  |
| C | -3.63880 | -1.57110 | 7.90095  |
| C | -4.98554 | -1.25713 | 7.94000  |
| C | -5.58543 | -0.54895 | 6.86983  |
| C | -4.84338 | -0.17754 | 5.76400  |
| C | -3.46245 | -0.49916 | 5.68867  |
| C | -1.20644 | 1.83558  | -0.79891 |
| C | -0.34711 | 1.41624  | -1.86743 |
| C | 1.01208  | 1.64769  | -1.48237 |
| C | 0.99411  | 2.24752  | -0.19617 |
| C | -0.35248 | 2.36594  | 0.22850  |
| C | -0.87037 | -1.61356 | -1.62670 |
| C | 0.54310  | -1.49762 | -1.81220 |
| C | 1.19342  | -1.92734 | -0.61910 |
| C | 0.16153  | -2.31628 | 0.30399  |
| C | -1.10426 | -2.12757 | -0.32987 |
| N | -1.51383 | -1.49333 | 6.76411  |
| N | -2.75303 | -0.16089 | 4.57200  |
| H | 1.28337  | -0.26498 | 4.21135  |
| H | 0.20512  | -1.39902 | 5.65436  |
| H | -3.15030 | -2.11337 | 8.71168  |
| H | -5.59086 | -1.55379 | 8.79738  |
| H | -6.64622 | -0.29984 | 6.92000  |
| H | -5.28807 | 0.36024  | 4.92616  |
| H | -2.29049 | 1.85002  | -0.80232 |
| H | -0.67103 | 0.99706  | -2.81436 |
| H | 1.86766  | 2.51666  | 0.38802  |
| H | -0.67844 | 2.73927  | 1.19184  |
| H | -1.63638 | -1.34081 | -2.34735 |
| H | 1.03639  | -1.12360 | -2.70430 |
| H | 2.26262  | -1.99003 | -0.45059 |
| H | 0.31014  | -2.67676 | 1.31535  |
| H | -2.07186 | -2.30639 | 0.12372  |
| H | 1.89779  | 1.42778  | -2.07132 |

**Energy:** -267.03661898 eV
